# Supplementary material for: Investigating the structure–activity relationship of marine natural polyketides as promising SARS-CoV-2 main protease inhibitors
Source: Royal Society of Chemistry journal article supplement (doi:10.1039/d1ra05817g), 2021-01-01

1 **Investigating the Structure-Activity Relationship of Marine Natural**  
2 **Polyketides as Promising SARS-CoV-2 Main Protease Inhibitors**

3 Amr El-Demerdash<sup>1,2,†,\*</sup>, Ahmed A. Al-Karmalawy<sup>3,†,\*</sup>, Tarek Mohamed Abdel-Aziz<sup>4,5</sup>, Sameh S.  
4 Elhady<sup>6</sup>, Khaled M. Darwish<sup>7</sup>, and Ahmed H.E. Hassan<sup>8,\*</sup>

5 <sup>1</sup> Organic Chemistry Division, Chemistry Department, Faculty of Science, Mansoura University, Mansoura  
6 35516, Egypt.

7 <sup>2</sup> Metabolic Biology & Biological Chemistry Department, John Innes Centre, Norwich Research Park, Norwich  
8 NR4 7UH, UK.

9 <sup>3</sup> Department of Pharmaceutical Medicinal Chemistry, Faculty of Pharmacy, Horus University-Egypt, New  
10 Damietta 34518, Egypt.

11 <sup>4</sup> Department of Cellular and Integrative Physiology, University of Texas Health Science Centre at San Antonio,  
12 San Antonio, Texas 78229-3900, USA.

13 <sup>5</sup> Zoology Department, Faculty of Science, Minia University, El-Minia 61519, Egypt.

14 <sup>6</sup> Department of Natural Products, Faculty of Pharmacy, King Abdulaziz University, Jeddah, Saudi Arabia.

15 <sup>7</sup> Department of Medicinal Chemistry, Faculty of Pharmacy, Suez Canal University, Ismailia, Egypt.

16 <sup>8</sup> Department of Medicinal Chemistry, Faculty of Pharmacy, Mansoura University, Mansoura 35516, Egypt.

17

18 **Figure S11.** Side-view of the full ligand-Mpro complexes embedded within the TIP3P system. (A)  
19 D1; (B) D2; (C) D3; (D) D4; (E) D5; (F) O6K; (G) N3. Proteins are represented as cartoon coloured  
20 green, ligand atoms are displayed as yellow spheres, while as TIP3P water molecules as lines. The  
21 ions are hidden for clarity.

22 (A)

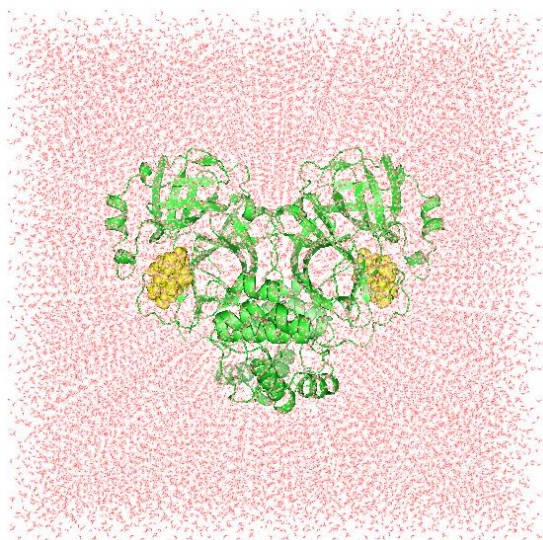

(B)

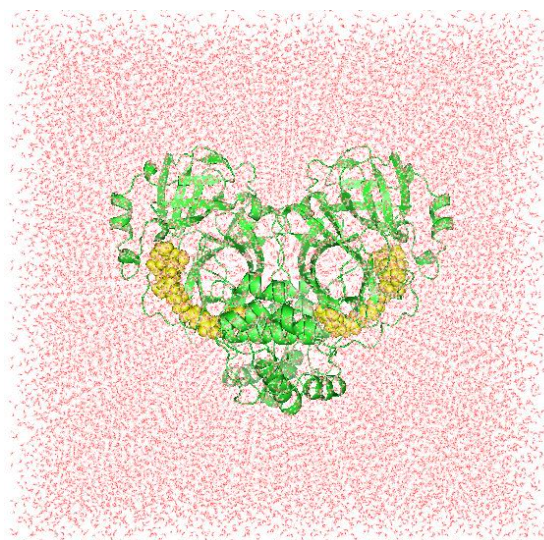

23

24



25 (C)

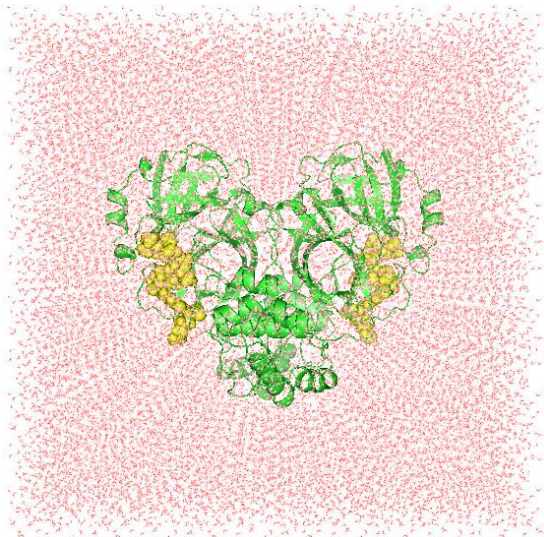

(D)

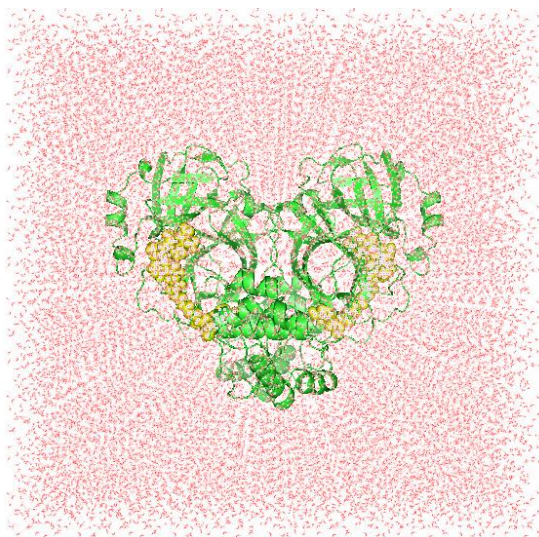

26

27 (E)

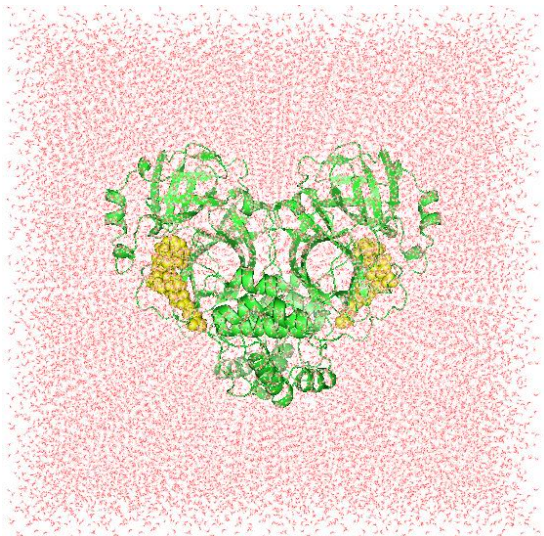

(F)

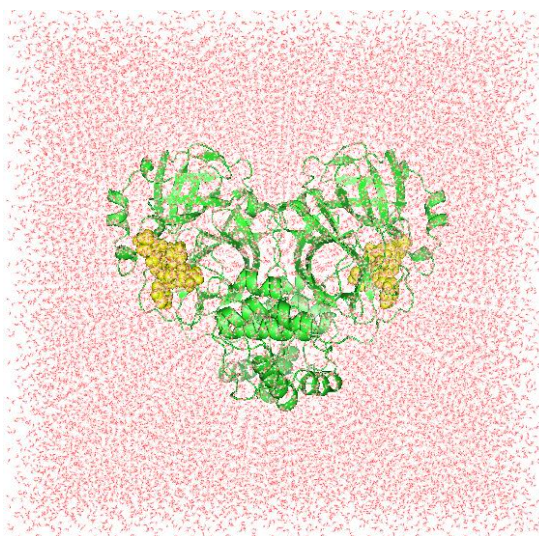

28

29 (G)

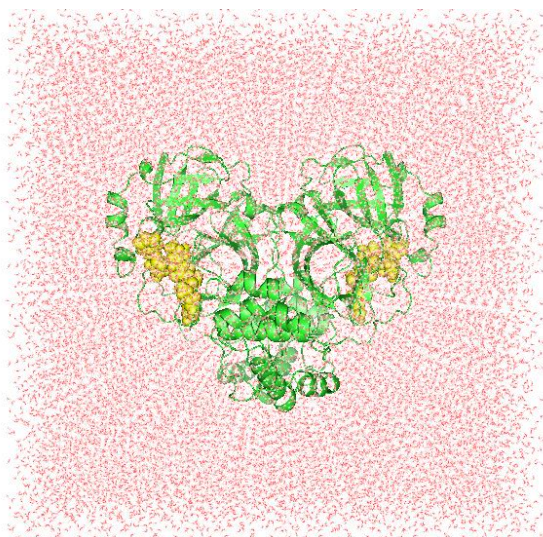

30

31

32 **Figure SI2.** 2D binding and positioning of the five examined marine products (**1**, **11**, **14**, **17**, and **29**)  
 33 besides the docked co-crystallized inhibitors (**35** and **36**) towards the binding pocket of SARS-CoV-2  
 34 Mpro.

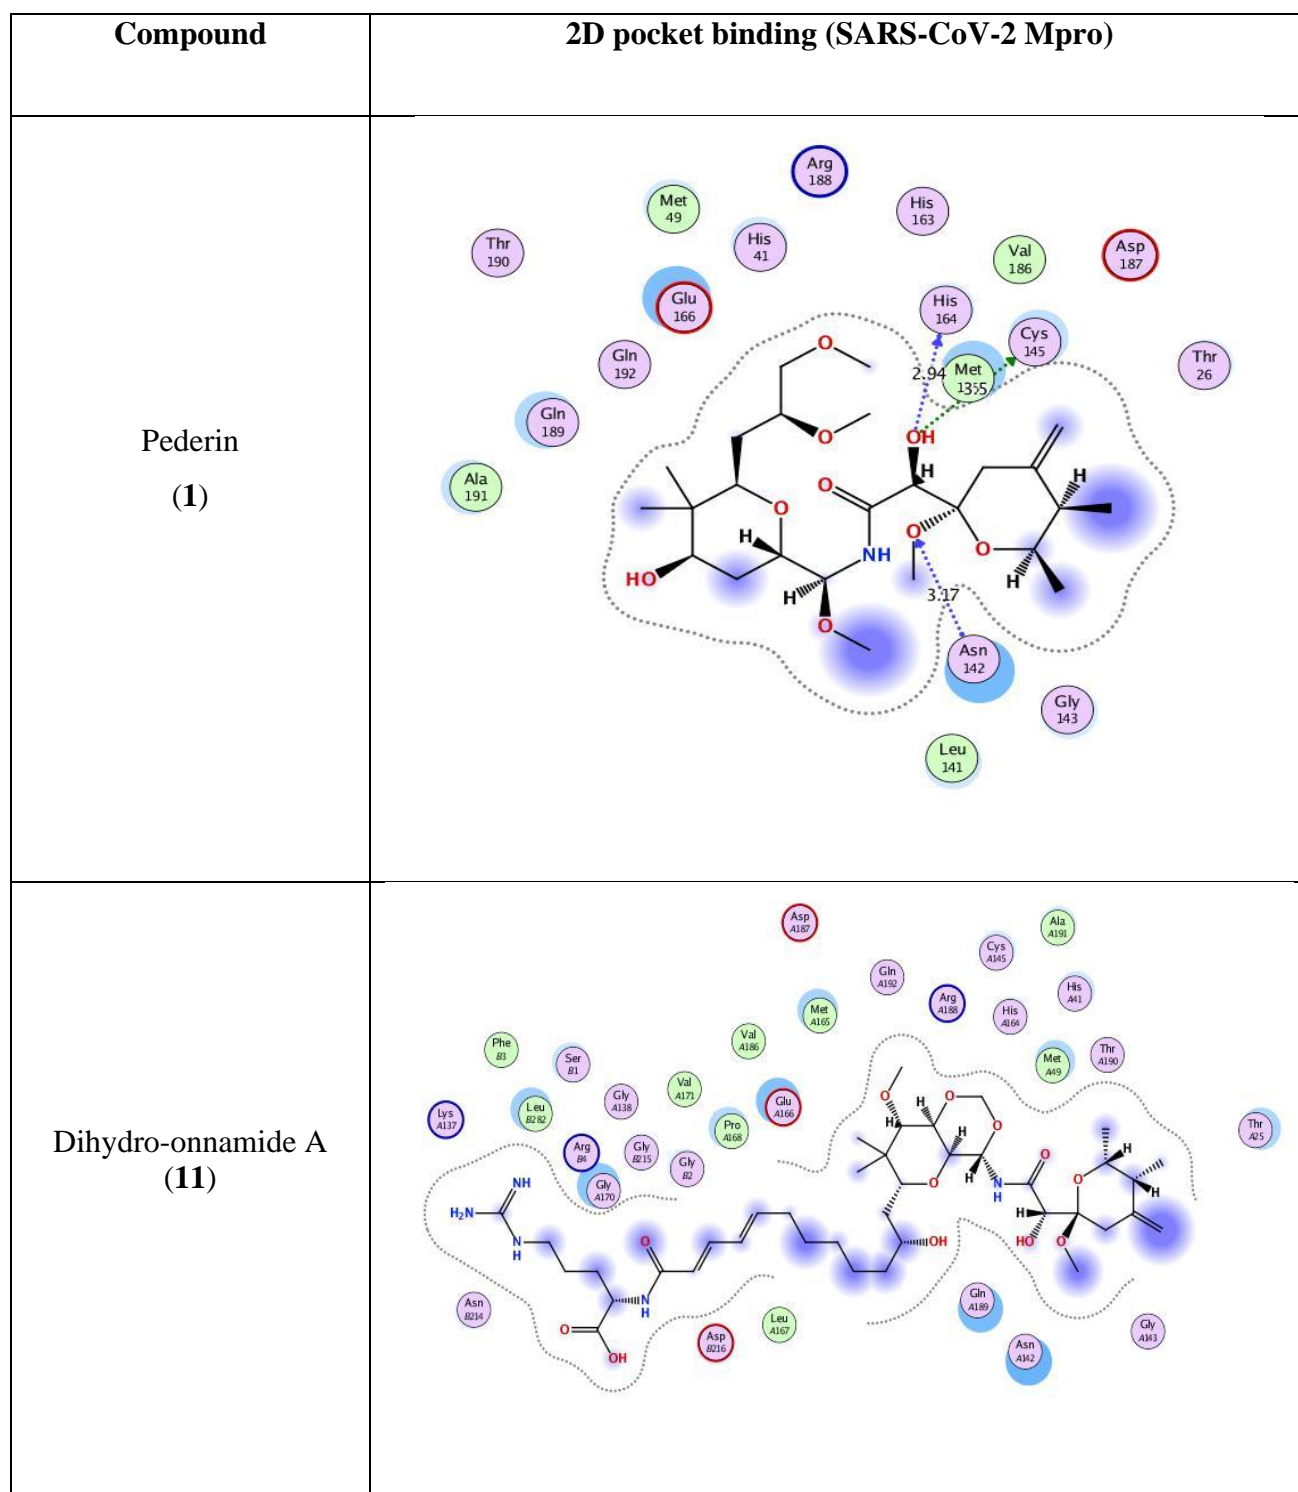



Onnamide C  
(14)

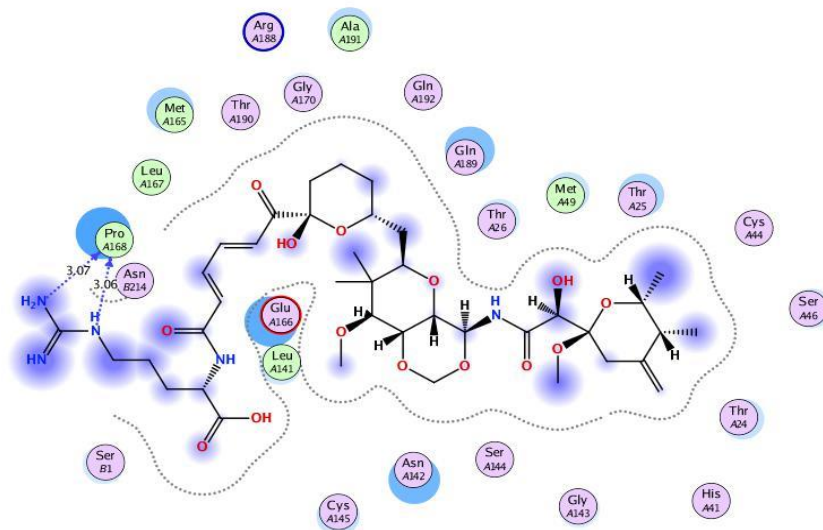

Pseudo-onnamide A  
(17)

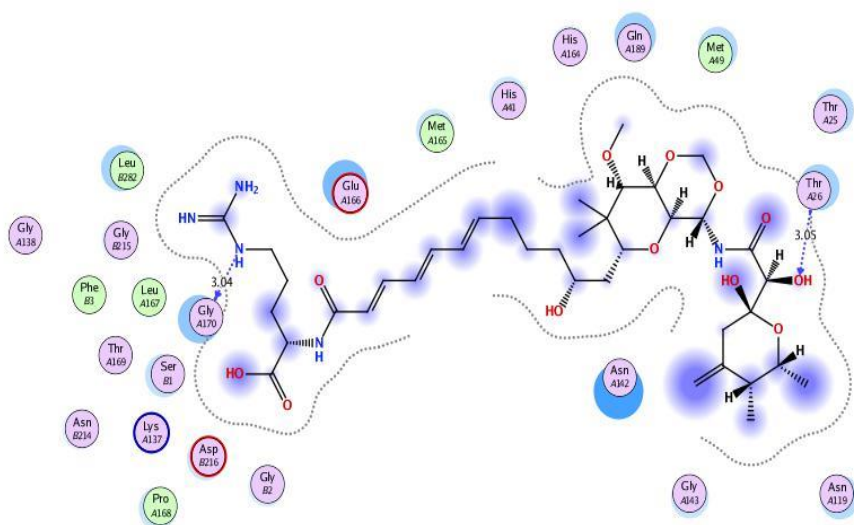

Theopederin G  
(29)

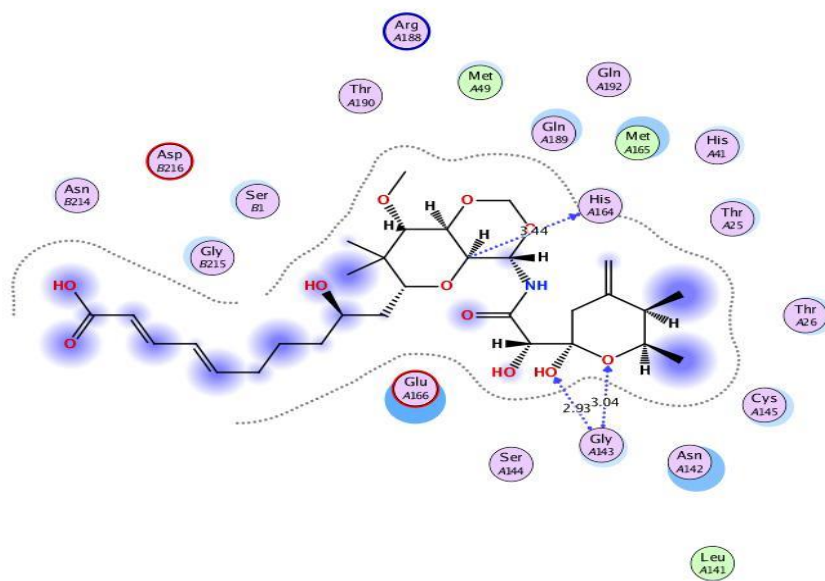

**6Y2G**  
co-crystallized inhibitor  
(O6K, 35)

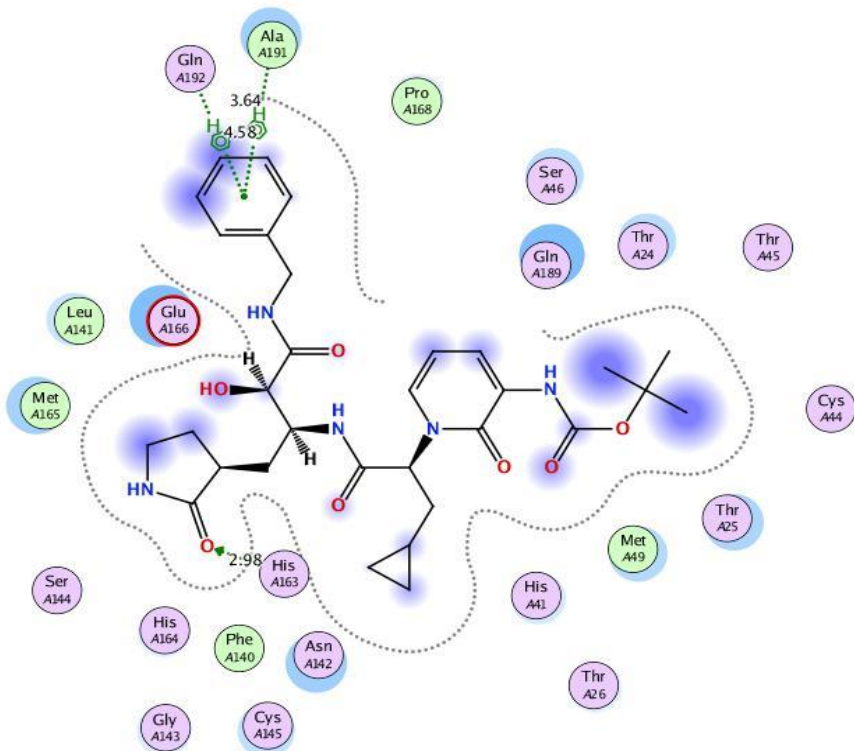

**6LU7**  
co-crystallized inhibitor  
(N3, 36)

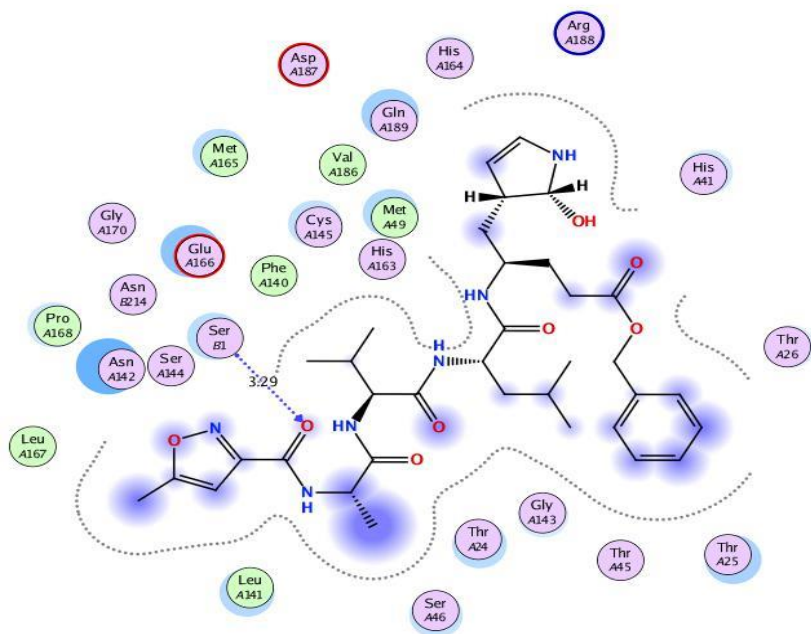

Supplement: d1ra05817g1.pdf [file d1ra05817g1.pdf]
